# Supplementary material for: Photodynamic optical sensor for buffer capacity and pH based on hydrogel-incorporated spiropyran
Source: Royal Society of Chemistry journal article supplement (doi:10.1039/c4cc07821g), 2014-10-27
Supplement: c4cc07821g1.pdf [file c4cc07821g1.pdf]

Electronic Supplementary Information

## Photodynamic optical sensor for buffer capacity and pH based on hydrogel-incorporated spiropyran

G. Mistlberger,<sup>\*a</sup> M. Pawlak,<sup>‡b</sup> E. Bakker<sup>b</sup> and I. Klimant<sup>a</sup>

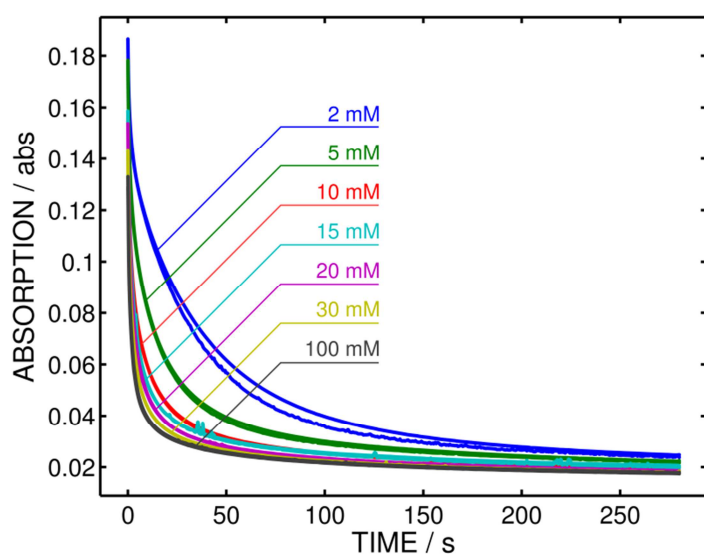

**Figure S1.** Kinetic response of the sensor film after UV illumination monitored over 280 seconds. The final point almost reaches the same, pH-dependent value, while shortly after the illumination the signal depends on the buffer concentration in the sample. A slight stirring effect is visible in the 2 mM sample, meaning that the transport of protons to the hydrogel is diffusion limited without pumping of the sample.

### Author Address

<sup>a</sup> Graz University of Technology, Institute of Analytical Chemistry and Food Chemistry, 8010 Graz, Austria. E-mail: g.mistlberger@gmail.com

<sup>b</sup> University of Geneva, Department of Inorganic and Analytical Chemistry, 1211 Geneva 4, Switzerland.

<sup>‡</sup> Current address: Optiqua Technologies, 82 WaterHub Toh Guan Road East #C2-11/1, 608576 Singapore
